RESEARCH ARTICLE

# Structure and antigenicity of the divergent human astrovirus VA1 capsid spike

Anisa Ghosh<sup>1</sup>, Kevin Delgado-Cunningham<sup>1</sup>, Tomás López<sup>2</sup>, Kassidy Green<sup>1</sup>, Carlos F. Arias<sup>2</sup>, Rebecca M. DuBois<sup>1\*</sup>

**1** Department of Biomolecular Engineering, University of California Santa Cruz, Santa Cruz, California, United States of America, **2** Departamento de Genética del Desarrollo y Fisiología Molecular, Instituto de Biotecnología, Universidad Nacional Autónoma de México, Cuernavaca, Morelos, Mexico

\* [rmdubois@ucsc.edu](mailto:rmdubois@ucsc.edu)

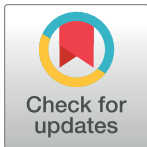

## OPEN ACCESS

**Citation:** Ghosh A, Delgado-Cunningham K, López T, Green K, Arias CF, DuBois RM (2024) Structure and antigenicity of the divergent human astrovirus VA1 capsid spike. PLoS Pathog 20(2): e1012028. <https://doi.org/10.1371/journal.ppat.1012028>

**Editor:** Félix A. Rey, Institut Pasteur, FRANCE

**Received:** October 13, 2023

**Accepted:** February 5, 2024

**Published:** February 28, 2024

**Peer Review History:** PLOS recognizes the benefits of transparency in the peer review process; therefore, we enable the publication of all of the content of peer review and author responses alongside final, published articles. The editorial history of this article is available here: <https://doi.org/10.1371/journal.ppat.1012028>

**Copyright:** © 2024 Ghosh et al. This is an open access article distributed under the terms of the [Creative Commons Attribution License](https://creativecommons.org/licenses/by/4.0/), which permits unrestricted use, distribution, and reproduction in any medium, provided the original author and source are credited.

**Data Availability Statement:** The coordinates and structure factors for the gastrointestinal and neuronal HAsV-VA1 capsid spike X-ray crystal structures have been deposited with the Protein Data Bank (PDB; <https://www.rcsb.org>) as entry 8UFO and 8UFN.

## Abstract

Human astrovirus (HAsV) is a known cause of viral gastroenteritis in children worldwide, but HAsV can cause also severe and systemic infections in immunocompromised patients. There are three clades of HAsV: classical, MLB, and VA/HMO. While all three clades are found in gastrointestinal samples, HAsV-VA/HMO is the main clade associated with meningitis and encephalitis in immunocompromised patients. To understand how the HAsV-VA/HMO can infect the central nervous system, we investigated its sequence-divergent capsid spike, which functions in cell attachment and may influence viral tropism. Here we report the high-resolution crystal structures of the HAsV-VA1 capsid spike from strains isolated from patients with gastrointestinal and neuronal disease. The HAsV-VA1 spike forms a dimer and shares a core beta-barrel structure with other astrovirus capsid spikes but is otherwise strikingly different, suggesting that HAsV-VA1 may utilize a different cell receptor, and an infection competition assay supports this hypothesis. Furthermore, by mapping the capsid protease cleavage site onto the structure, the maturation and assembly of the HAsV-VA1 capsid is revealed. Finally, comparison of gastrointestinal and neuronal HAsV-VA1 sequences, structures, and antigenicity suggests that neuronal HAsV-VA1 strains may have acquired immune escape mutations. Overall, our studies on the HAsV-VA1 capsid spike lay a foundation to further investigate the biology of HAsV-VA/HMO and to develop vaccines and therapeutics targeting it.

## Author summary

Human astroviruses, well-established as a leading cause of viral diarrhea, are increasingly associated with viral encephalitis in immunocompromised patients, with the sequence-divergent VA1 strains being the most common in these cases. Our study presents the high-resolution capsid spike structures from VA1 strains isolated from patients with both gastrointestinal and neuronal manifestations. Compared to the classical human astrovirus capsid spike structure, the VA1 capsid spike structure has striking differences in size, shape, and surface features, suggesting that the divergent VA1 strains may have evolved a different mechanism to attach to host cells, which in turn may influence their ability to

**Funding:** This research was supported by NIH/ NIAID grant R01AI144090 to R.M.D. and C.F.A., and grant CONACyT M0037-Fordecyt 302965 to C. F.A. The funders had no role in the study design, data collection and analysis, decision to publish, or the preparation of the manuscript.

**Competing interests:** The authors have declared that no competing interests exist.

infect the central nervous system. On the other hand, comparison of the gastrointestinal and neuronal VA1 spike structures reveals few differences. Instead, sequence and antigenic studies suggest that neuronal VA1 strains isolated from immunocompromised patients may have acquired mutations to escape immunoglobulin therapy. Altogether, this work provides a structural basis to investigate the mechanism of infection by the divergent human astrovirus VA1 strains and to develop tailored diagnostics, vaccines, and therapeutics against them.

## Introduction

Astroviruses, first described in 1975 and belonging to the *Astroviridae* family, are non-enveloped, positive-sense single-stranded RNA viruses known to infect a wide range of avian and mammalian species [1]. Classical human astroviruses (HAsVs) include serotypes 1–8, and are associated with acute or severe gastroenteritis mainly in children; almost 90% of children possess detectable antibodies to one of the classical HAsV serotypes [2–5]. During the last decade, two clades of novel and highly divergent human astroviruses, HAsV-MLB and HAsV-VA/HMO, were discovered in patients suffering from gastroenteritis [6–10]. However, a definitive association between these novel clades and gastroenteritis has not yet been established [11,12]. Phylogenetic studies of ORF2-encoded capsid protein sequences showed that these divergent MLB and VA/HMO clades are more closely related to animal astroviruses than to classical HAsVs. For example, HAsV-VAs are most closely related to ovine and mink astroviruses, resulting in the naming of the Human Mink Ovine (HMO) clade [13–20]. Notably, many of these related animal astroviruses are found to be associated with neurological disease in ovine, minks, bovine, porcine, alpacas, and muskox [13,20,21], and HAsV-VAs are increasingly being associated with neurological disease. In 2010, HAsV-VA1 was first identified by metagenomic sequencing as the causative agent of encephalitis in an immunocompromised patient with X-linked agammaglobulinemia who ultimately died after 71 days of hospitalization [6]. To date, 15 cases of neuronal HAsV infections have been reported in immunocompromised individuals, causing encephalitis or meningitis and resulting in high mortality rates [22–34]. Of these cases, a majority (9/15) were caused by HAsV-VA1. Recently, a study of adult and pediatric serum samples showed a high seroprevalence of neutralizing antibodies to HAsV-VA1, with a seropositivity rate of 77% in adults [35]. Altogether, these studies demonstrate that humans are commonly exposed to HAsV-VA1, and rare but often fatal cases of HAsV infections in the central nervous system (CNS) occur in immunocompromised individuals.

HAsVs have an icosahedral capsid that encapsulates the ~6.8 kb positive-sense ssRNA genome. The genome of astrovirus is comprised of 5′ and 3′ untranslated regions and four open reading frames (ORFs) (ORF1a, ORF1b, ORFX, and ORF2). The non-structural polyproteins nsP1a and nsP1b, encoded by ORF1a and ORF1b, are translated from the genomic RNA; these proteins are proteolytically processed into smaller proteins to yield the RNA-dependent RNA polymerase, a serine protease, a viral genome-linked protein (VPg), and several other proteins with unknown functions [36–39]. The other two ORFs, ORFX and ORF2, are overlapping and translated from the subgenomic RNA. ORFX, which is found in only group I Astroviruses, encodes a viroporin protein [40,41]. ORF2 encodes the capsid precursor protein VP90 [37–39].

The HAsV capsid precursor protein comprises several domains, including a highly basic amino terminus that binds to the RNA genome, a core domain that forms the icosahedral

shell, a spike domain that forms dimeric protrusions, and an acidic domain with unknown function at the carboxy terminus (Fig 1B). In classical HAsVs, the capsid precursor protein VP90 self-assembles and is cleaved by intracellular host caspases to remove the acidic domain, resulting in VP70 immature HAsV particles [42–44]. After release from the infected cells, further proteolytic processing by host extracellular proteases yields mature HAsVs. *In vitro*, trypsin is required to generate the mature, infectious virus for the classical HAsVs, resulting in two predominant capsid proteins: VP34 and VP27 [42,43,45,46]. In contrast, the HAsV-VA1 capsid precursor protein VP86 is cleaved intracellularly in a caspase-independent manner by one or more unknown proteases [47].

Structural and mechanistic studies have shed light on the HAsV capsid roles in virus entry. First, cryoelectron microscopy was used to elucidate the structure of mature classical HAsV, revealing a ~35nm diameter T = 3 icosahedral capsid studded with dimeric spike protrusions

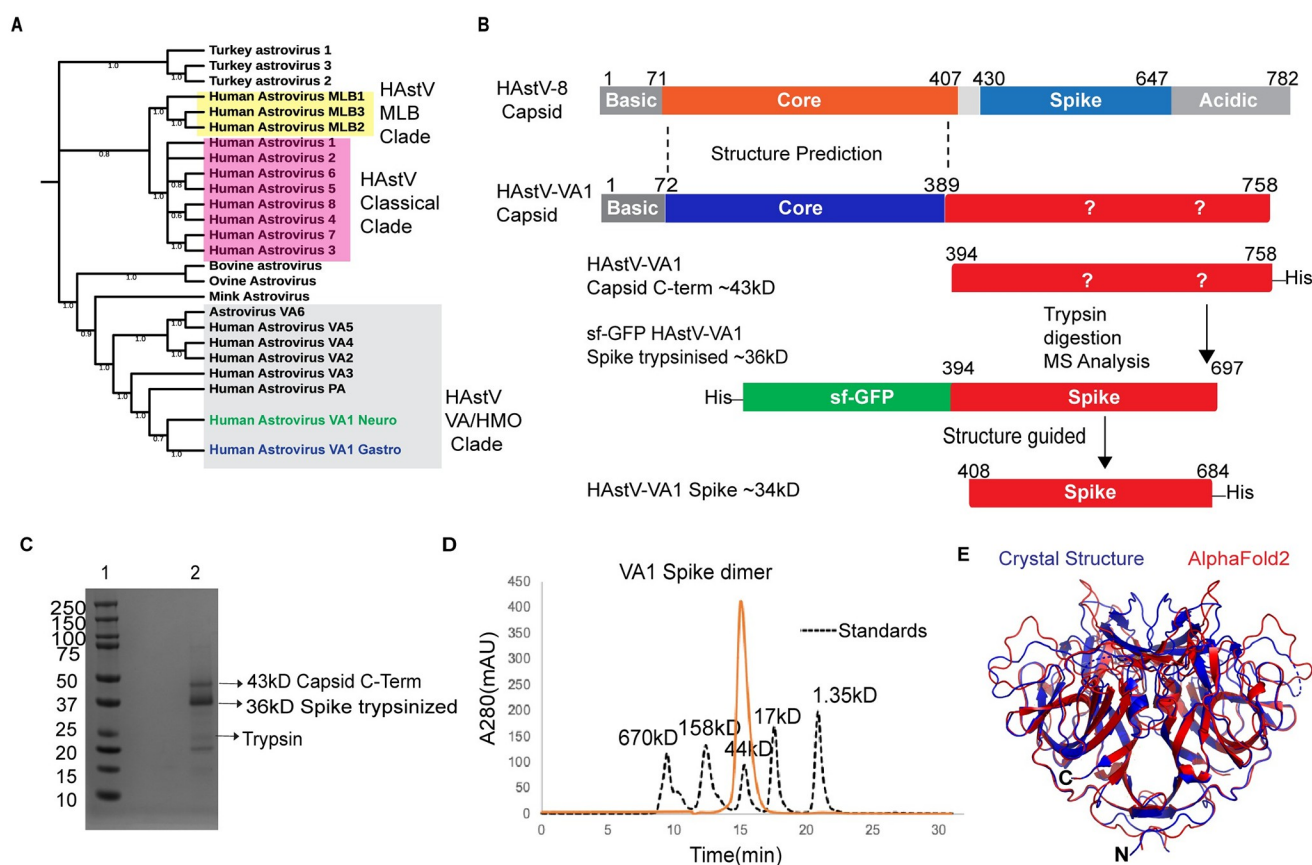

**Fig 1. Phylogenetic analysis of HAsVs and delineation of the HAsV-VA1 capsid spike domain.** (A) Phylogenetic analysis of human and animal astroviruses. Complete capsid sequences were aligned using the MUSCLE Algorithm, and evolutionary analysis was done using MEGA 11 maximum Likelihood and JTT matrix-based model to yield the cladogram shown. Bootstrap values are shown next to the branches and were computed using 1,000 replicates. Turkey astrovirus 1–3 capsid sequences were used as an outgroup. (B) Schematic of HAsV-8 and HAsV-VA1 capsid structural domains and recombinant HAsV-VA1 capsid protein constructs. Question marks indicate the unknown termini of the spike domain and acidic region. (C) Coomassie-stained SDS-PAGE of limited proteolysis of HAsV-VA1 Capsid C-term with trypsin. Lane 1: molecular weight marker, in kD (Biorad Precision Plus Protein Dual Color Standards). Lane 2: trypsin digestion products showing bands for the 43 kD capsid C-term, the 36 kD Spike trypsinized, and trypsin. (D) Superdex 200 size-exclusion chromatography trace of recombinant HAsV-VA1 spike dimer (orange) overlaid with the trace of gel filtration standards (black dotted line). (E) Structural alignment between the 1.46 Å-resolution crystal structure of HAsV-VA1 spike and the AlphaFold2-predicted HAsV-VA1 spike, which was predicted for the 15th Community Wide Experiment on the Critical Assessment of Techniques for Protein Structure Prediction (CASP15). A structural alignment was performed using TM ALIGN software with a TM-Score of 0.85 and an RMSD of 2.90 Å across 264 residue pairs.

<https://doi.org/10.1371/journal.ppat.1012028.g001>

at the icosahedral 2-fold axes [48]. Subsequent X-ray crystallographic studies elucidated the high-resolution structures of the HAsV-1 and -8 capsid core domains [49,50], as well as the capsid spike domains from HAsV-1, -2, and 8, turkey astrovirus 2, and the novel divergent HAsV-MLB1 [51–55]. The spike domain is utilized by classical HAsVs for attachment to host cells, and neutralizing antibodies that block classical HAsV attachment to human Caco-2 cells bind to several distinct epitopes on the spike domain [54,56,57]. Previous studies mapped putative receptor-binding sites onto the classical HAsV spike structures [52]. Recently, the neonatal Fc receptor (FcRn) was identified as a candidate receptor for classical HAsVs [58]. Notably, the classical HAsV-1, -2, and -8 spike structures are structurally similar (RMSD  $\sim 1.2$  Å), and while the HAsV-MLB1 spike structure retains a similar overall fold, it is more structurally divergent (RMSD  $\sim 3.7$  Å) and does not have any of the putative receptor-binding sites found on classical HAsV spikes [51,52]. The structure of the divergent HAsV-VA spike has remained elusive.

Here we report the high-resolution crystal structures of the capsid spike of two HAsV-VA1 strains: one strain isolated from a gastrointestinal infection, and a second obtained from a brain biopsy of a patient with neurological disease. These structures provide insights into HAsV-VA entry, evolution, maturation, and antigenicity. Specifically, comparison of the HAsV-VA1 spike structure with classical HAsV and HAsV-MLB spike structures reveals a related dimer formation and core beta-barrel structure. However, the HAsV-VA1 spike is otherwise larger and strikingly different, suggesting that it may utilize a different mechanism to attach to host cells. N-terminal sequencing and mass spectrometry analyses of mature HAsV-VA1 revealed the cleavage site of the capsid precursor VP86 protein, illuminating the maturation and assembly of the HAsV-VA1 capsid VP33 and VP38 proteins in the context of the capsid structural domains. Finally, antigenic studies support that neuronal HAsV-VA1 strains have acquired immune escape mutations. Overall, these studies provide a structural basis to understand HAsV-VA/HMO viruses and support the development of vaccines and therapeutics against these divergent HAsVs.

## Results

### Delineation of the HAsV-VA1 capsid spike domain

To delineate the HAsV-VA capsid spike structural domain, we first evaluated the evolutionary relationship of complete capsid protein sequences from classical, MLB, and VA/HMO clades, as well as related animal astroviruses (Fig 1A). We began by studying the capsid sequence from the first neuronal HAsV-VA1 (HAsV-VA1<sup>neuro</sup>) found to be associated with encephalitis in an immunocompromised patient who ultimately died after 71 days of hospitalization [28]. Sequence alignment of this HAsV-VA1<sup>neuro</sup> capsid protein sequence with that of classical HAsV-8 identified a region in the first  $\sim 400$  amino acids of each protein with  $\sim 40\%$  sequence identity, and HHPred structural analysis predicted structural homology to the capsid core structural domain in HAsV-1 and -8 [49] (Fig 1B). In contrast, there was no sequence identity in the C-terminal regions of the capsid proteins that form the spike structural domain and the acidic region in HAsV-8 (Fig 1B). We first generated over 15 constructs with varying N- and C-termini that we predicted would form the HAsV-VA1 capsid spike structural domain, however all attempts to express these proteins recombinantly in *E. coli* resulted in insoluble protein. In a different approach, we generated a larger construct encoding the C-terminal residues 394–758 of the HAsV-VA1<sup>neuro</sup> capsid protein ( $\sim 43$  kD) (Fig 1B), and expressed this protein in Sf9 insect cells. Despite low yields (micrograms per liter), this recombinant protein was soluble, and limited proteolysis with trypsin resulted in a trypsin-resistant fragment of  $\sim 36$  kD (Fig 1C). Mass spectrometry analysis revealed a mass of 36,020 Daltons,

Table 1. Crystallography data collection and refinement statistics.

|                                                   | VA1 Spike <sup>Gastro</sup> | VA1 Spike <sup>Neuro</sup>                     |
|---------------------------------------------------|-----------------------------|------------------------------------------------|
| <b>Data Collection<sup>a</sup></b>                |                             |                                                |
| PDB Code                                          | 8UFO                        | 8UFN                                           |
| Space group                                       | C 1 2 1                     | P 2 <sub>1</sub> 2 <sub>1</sub> 2 <sub>1</sub> |
| a, b, c (Å)                                       | 109.62, 82.56, 61.12        | 61.203, 86.32, 108.85                          |
| α, β, γ (°)                                       | 90, 102.71, 90              | 90, 90, 90                                     |
| Resolution (Å)                                    | 65.35–1.46 (1.49–1.46)      | 46.04–2.73 (2.86–2.73)                         |
| R <sub>merge</sub>                                | 0.051 (0.150)               | 0.354 (2.102)                                  |
| R <sub>pim</sub>                                  | 0.019 (0.065)               | 0.144 (0.876)                                  |
| I/σI                                              | 18.7 (7.2)                  | 7.6 (1.5)                                      |
| Completeness (%)                                  | 100.0 (99.9)                | 100.0 (100.0)                                  |
| Multiplicity                                      | 6.4 (5.4)                   | 13.0 (12.6)                                    |
| CC <sub>1/2</sub>                                 | 0.999 (0.981)               | 0.989 (0.616)                                  |
| <b>Refinement</b>                                 |                             |                                                |
| No. of reflections                                | 91236 (9043)                | 15876 (1541)                                   |
| Resolution (Å)                                    | 41.28–1.46                  | 46.04–2.73                                     |
| R <sub>work</sub> /R <sub>free</sub> <sup>b</sup> | 0.152 / 0.176               | 0.251 / 0.310                                  |
| Atoms                                             | 4880                        | 4279                                           |
| Protein                                           | 4322                        | 4279                                           |
| Water                                             | 558                         | 0                                              |
| Mean B factor (Å <sup>2</sup> )                   | 14.82                       | 46.44                                          |
| Protein (Å <sup>2</sup> )                         | 13.44                       | 46.44                                          |
| Water (Å <sup>2</sup> )                           | 25.55                       | N/A                                            |
| <b>RMSD</b>                                       |                             |                                                |
| Bond lengths (Å)                                  | 0.007                       | 0.003                                          |
| Bond angles (°)                                   | 1.01                        | 0.59                                           |
| <b>Ramachandran statistics</b>                    |                             |                                                |
| Favored (%)                                       | 99.06                       | 91.03                                          |
| Allowed (%)                                       | 0.94                        | 8.9                                            |
| Outliers (%)                                      | 0.00                        | 0.00                                           |

<sup>a</sup> The values in parentheses are for the outermost shell.

<sup>b</sup> R<sub>free</sub> is the R<sub>work</sub> based on 10% of the data excluded from the refinement.

<https://doi.org/10.1371/journal.ppat.1012028.t001>

similar to a predicted tryptic fragment of 35,970 Daltons that would be generated by cleavage after arginine 697. Thus, a new construct encoding the HAstV-VA1<sup>neuro</sup> capsid residues 394–697 (~36 kD) was generated as a fusion protein with superfolder GFP (sf-GFP) (Fig 1B) and expressed in insect cells with improved yields (milligrams per Liter). Following removal of the sf-GFP, the HAstV-VA1<sup>neuro</sup> capsid spike protein was crystallized and diffraction data to a resolution of 2.73 Å was collected (Table 1).

### Crystal structure determination of the HAstV-VA1 capsid spike

At the time, no predicted structural model allowed us to successfully obtain a solution by molecular replacement. A predicted structural model generated by AlphaFold2 for the 2022 CASP15 competition also did not work. However, we gradually deleted amino acids with the lowest pLDDT confidence scores (ultimately removing ~20% of the model's amino acids with pLDDT scores <55) and finally obtained a convincing molecular replacement solution.



The structure of the HAsV-VA1<sup>neuro</sup> capsid spike was solved to 2.73 Å resolution (Table 1 and S1 Fig). Structural alignment of the experimentally-determined HAsV-VA1 spike crystal structure with the AlphaFold2 predicted model using TM-align revealed an RMSD of 2.90 Å across 264 residue pairs and a TM-score of 0.85, revealing a relatively accurate match in the beta-strand and alpha-helical regions and significant differences in the loop regions (Fig 1E).

The HAsV-VA1<sup>neuro</sup> capsid spike structure provided a guide to generate a new construct encoding only the amino acids that form the HAsV-VA1 spike structural domain (residues 408–684) (Fig 1B), and this construct yielded a soluble protein in *E. coli*. We then used this strategy to generate a construct encoding the capsid spike structural domain from a gastrointestinal HAsV-VA1 (HAsV-VA1<sup>gastro</sup>) identified in 2008 in an individual with acute gastroenteritis [6]. This recombinant HAsV-VA1<sup>gastro</sup> capsid spike protein forms a dimer in solution, consistent with other HAsV capsid spikes (Fig 1D). The HAsV-VA1<sup>gastro</sup> capsid spike was then crystallized and its structure was solved to 1.46 Å resolution (Table 1).

### Structural comparisons of the HAsV-VA1 spike to classical and MLB HAsV spikes

The HAsV-VA1 spike structural domain forms a homodimer, with each protomer encompassing residues 408–684 (Fig 2A). We note here that our use of the terminology “HAsV-VA1 spike domain” refers to the structural domain of a single protomer, whereas “HAsV-VA1 spike” refers to the globular dimer formed by two spike domains. The HAsV-VA1 spike has ~3648 Å<sup>2</sup> buried at the dimer interface mediated by 93 interface residues, which is similar to the classical HAsV-1, -2, and -8 spikes, which have dimer interfaces of 3500–3800 Å<sup>2</sup>, and also to the divergent HAsV-MLB1 spike, which has ~3100 Å<sup>2</sup> dimer interface [49,51,52,54,55] (Fig 2). Also similar to other HAsV spikes, the structural domain of each protomer of the HAsV-VA1 spike comprises a core antiparallel beta-barrel, formed by beta-strands 1, 9, 10, 16, and 18. Despite these general similarities, the overall shape, size, and surface of the HAsV-VA1 spike is strikingly different (Fig 2), with the HAsV-VA1 spike dimer being ~64kD compared to the ~50kD canonical and MLB1 spike dimers. Structural alignment of the HAsV-VA1 spike domain with HAsV-2 and HAsV-MLB spike domains using TM-align revealed RMSDs of 3.88 Å and 3.67 Å and TM-scores of 0.74 and 0.73, respectively, revealing the divergence of the structures. One notable structural difference of the HAsV-VA1 spike is the orientation of long opposing loops that extend over the top of the spike (the region between strands β12 and β14 in the HAsV-VA1 spike). In classical HAsV and HAsV-MLB spikes, the loops lie side-by-side across the top of the spike, whereas in HAsV-VA1 spike the loops wrap around each other intimately in a “yin and yang” fashion (Fig 2). Interestingly, these loops at the top of the classical HAsV spike are involved in dimerization and reactivity with neutralizing antibodies [52,57]. Altogether, these size and structural differences result in a completely different biochemical surface on the HAsV-VA1 spike compared to the classical and MLB spikes, with no obvious three-dimensional patches of sequence similarity that might indicate a conserved receptor-binding site. In other words, our structural observations support the hypothesis that classical and HAsV-VA1 may utilize a different host cell receptor.

To test this hypothesis, an infection competition assay was conducted to assess the ability of recombinant HAsV-1 or HAsV-VA1 capsid spike to impede infection by the homologous or heterologous HAsV [51]. The rationale underlying this investigation is based on the assumption that if all HAsVs share the same receptor, either spike will compete for the interaction with a common receptor, hindering infection of both the homologous and the heterologous

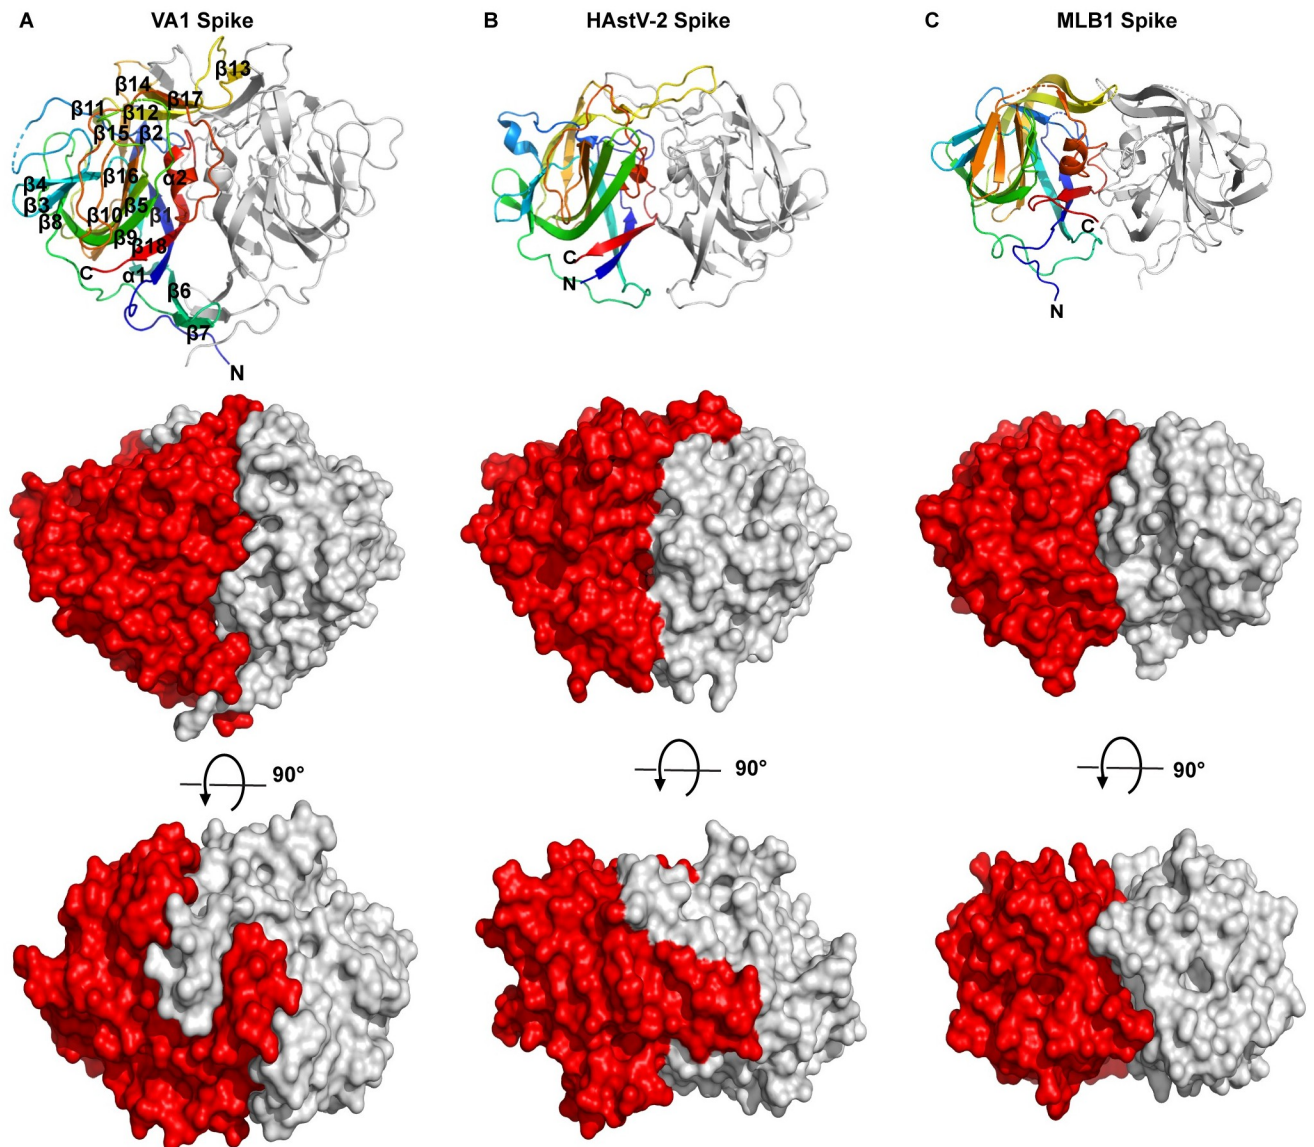

**Fig 2. Comparison of the HAstV-VA1 spike structure to the classical and MLB HAstV spike structures.** (A) Structure of HAstV-VA1 spike dimer presented as a cartoon model with labeled features on one protomer colored rainbow from the N-terminus (blue) to the C-terminus (red) (top panel). Below, the dimer is presented as a surface model (red and grey) as the side view (middle panel) and top view (bottom panel). (B) Structure of classical HAstV-2 spike dimer (PDB: 5W1N) presented as a cartoon model and colored rainbow (top panel) and presented as a surface model (middle and bottom panels). (C) Structure of HAstV-MLB spike dimer (PDB: 7UZT) presented as a cartoon model and colored rainbow (top panel) and presented as a surface model (middle and bottom panels). Flexible residues that were not visible in each structure are drawn as dashed lines.

<https://doi.org/10.1371/journal.ppat.1012028.g002>

HAstV. First, we found that recombinant HAstV-1 spike inhibited HAstV-1 infection in a dose-dependent manner, consistent with previous observations (Fig 3) [51]. Likewise, the recombinant HAstV-VA1 spike inhibited HAstV-VA1 infection in a dose-dependent manner (Fig 3). In contrast, recombinant HAstV-1 spike did not inhibit HAstV-VA1 infection, and recombinant HAstV-VA1 spike did not inhibit HAstV-1 infection (Fig 3). Thus, these data support the hypothesis that HAstV-VA1 utilizes a distinct host cell receptor compared to HAstV-1.

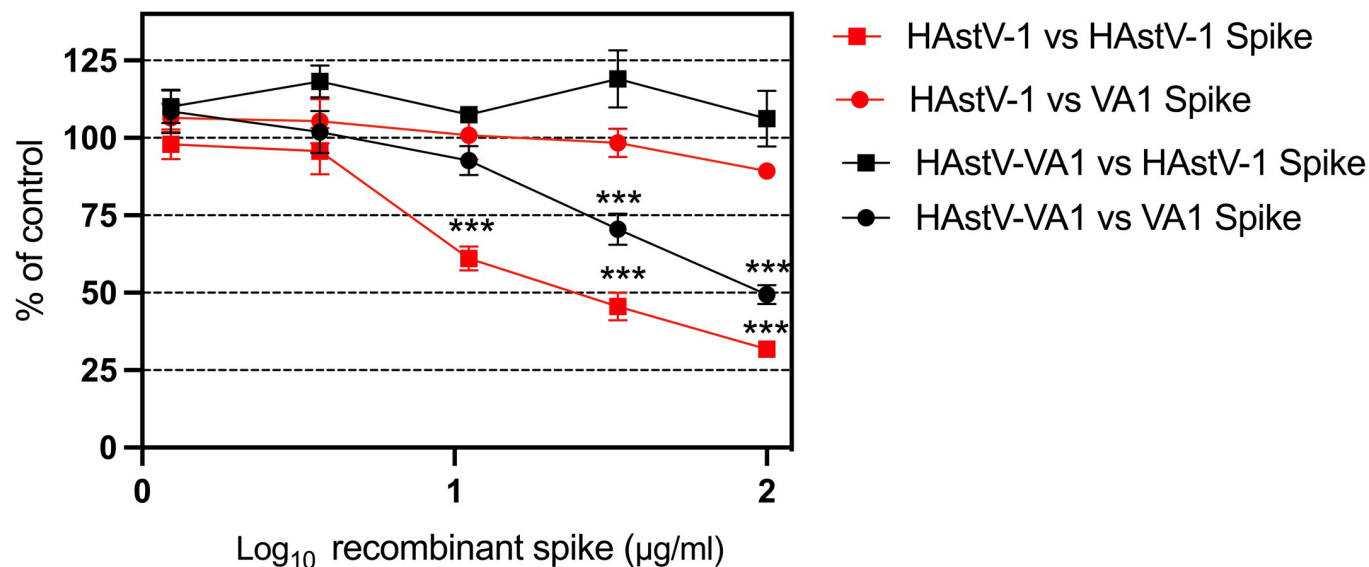

**Fig 3. *In vitro* HAstV infection competition assay.** Caco-2 cells were infected with HAstV-1 (red) or HAstV-VA1 (black) in the presence of the indicated concentration of recombinant HAstV-1 spike (squares) or VA1 spike (circles). Recombinant spike blocks infectivity by homologous HAstV but not heterologous HAstV. The data represent the HAstV infectivity in cells in the presence of each recombinant spike compared with infectivity in the absence of recombinant spike. The arithmetic means  $\pm$  SEM from three independent experiments performed in duplicate are shown. \*\*\* $p < 0.001$ .

<https://doi.org/10.1371/journal.ppat.1012028.g003>

### Mapping the cleavage site and proteins that form the mature HAstV-VA1 capsid

It was previously shown that the HAstV-VA1 capsid precursor protein VP86 is processed intracellularly into two fragments, an N-terminal fragment VP33 and a C-terminal fragment VP38 whose amino terminus was mapped to Thr348 [47]. To determine the composition of the VP33 and VP38 proteins that form the mature capsid, and to attempt to determine the C-termini of VP33 and VP38, HAstV-VA1 virus particles were purified using a CsCl gradient [42], and the capsid proteins were separated by SDS-PAGE and stained with Coomassie blue. As expected, two major bands were observed at 33 kD (VP33) and 38 kD (VP38) (Fig 4B). The corresponding bands in the gel were excised and subjected to trypsin or proalanase digestion followed by liquid chromatography and tandem mass spectrometry analysis. Shown in Fig 4A are the identified VP33 peptides colored yellow and the identified VP38 peptides colored green. It is unclear if the amino acids not observed (grey) is due to their absence in the processed proteins that compose the mature virus or to a technical challenge of identifying them by mass spectrometry; however, the expected molecular weights for the regions identified are close to the observed band sizes by SDS-PAGE (yellow VP33 amino acids would be 32.8 kD and green VP38 amino acids would be 37.1 kD).

To understand these data in the context of the mature HAstV-VA1 virion, we mapped out this sequence information onto the structures of the HAstV-VA1 capsid core and spike structural domains (Fig 4C). While the HAstV-VA1 capsid core domain structure has not been experimentally determined, it is expected to be similar to the crystal structure of the classical HAstV capsid core due to their ~40% sequence identity. Indeed, a structural alignment of an AlphaFold2 model of the HAstV-VA1 capsid core with HAstV-1 core using TM-align reveals an RMSD of 2.36 Å and TM-score of 0.91. A number of interesting observations emerged. First, VP33 amino acids encompass the N-terminal basic region and the first ~2/3 of the predicted core structural domain. The positively-charged N-terminal residues 1–71 that precede



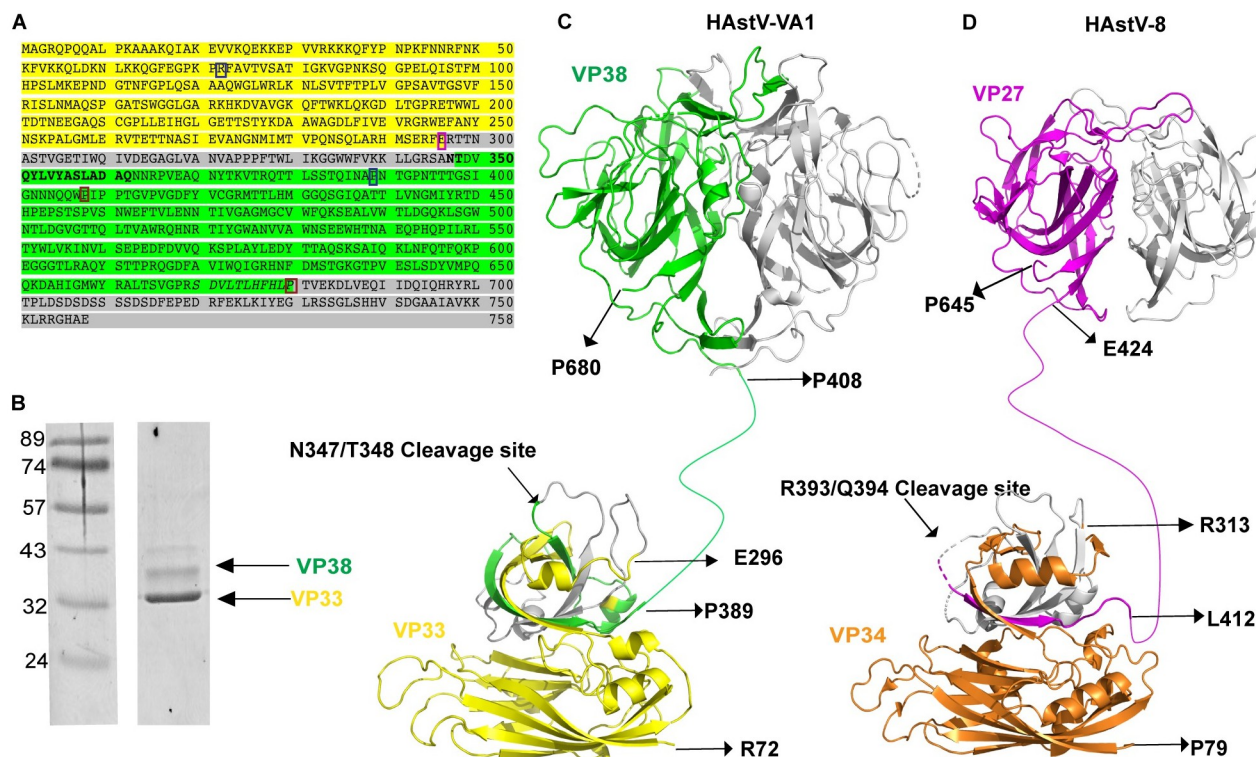

**Fig 4. Processing and assembly of the mature HAstV-VA1 capsid protein.** (A) The complete amino acid sequence of the HAstV-VA1 capsid precursor protein (GenBank accession number YP\_003090288.1) is shown. Amino acids highlighted in yellow were identified by mass spectrometry as peptides of VP33, and those highlighted in green correspond to peptides of the VP38. Amino acids that are not observed are highlighted in grey. The cleavage site that generates the amino-terminal end of VP38, previously determined by Edman degradation, is shown in bold. The blue boxes correspond to the N- and C-termini of the core domain, whereas the red boxes correspond to the N- and C-termini of the spike domain. The pink box corresponds to amino acid E296, the last amino acid detected in VP33. (B) Coomassie-stained SDS-PAGE analysis of CsCl-purified virus. Lane 1: molecular weight marker, in kD. Lane 2: two bands corresponding to the HAstV-VA1 capsid proteins VP33 and VP38. Bands were excised and utilized for proteolytic digestion, liquid chromatography, and tandem mass spectrometry to identify peptides. (C) Model of the mature HAstV-VA1 capsid protein. An AlphaFold2-predicted core domain structure, a linker region, and the spike domain crystal structure are shown, colored as in panel A. The second protomer of the spike domain is colored grey. The N-terminal amino acids 1–71 that are present in VP33 are not shown. Domain termini are labeled (R72 and P389 (core domain), and P408 and P680 (spike domain)). The location of the cleavage site that results in the N-terminus of VP38 (N347/T348) is indicated. The location of E296, the last observed amino acid of VP33, which is in a structurally similar location as a known trypsin cleavage site in classical HAstVs, is indicated. (D) Model of the mature classical HAstV-8 capsid protein. The crystal structure of the HAstV-8 core domain (PDB: 5IBV), a linker region, and the crystal structure of the HAstV-8 spike domain (PDB: 3QSQ) are shown. The second protomer of the spike domain is colored grey. The N-terminal amino acids 1–76 that are present in VP34 are not shown. Domain termini are labeled (R77 and L412 (core domain), and E424 and P645 (spike domain)). The location of the trypsin cleavage site that results in the N-terminus of VP27 (R393/Q394) is indicated. The location of R313, a trypsin cleavage site, is indicated.

<https://doi.org/10.1371/journal.ppat.1012028.g004>

the core structural domain are likely inside the capsid and interact with the viral RNA genome. Residues 72–255 form the inner region of the core structural domain that has a typical jelly-roll beta-barrel fold commonly found in capsid proteins of icosahedral viruses. Residues 256–296 form a predicted beta-hairpin and an alpha-helix in the outer region of the core domain. Residues 297–347 that were not identified by mass spectrometry map to this outer region, suggesting that they are accessible on the surface of the assembled virus capsid for protease cleavage. It is interesting to note that residue E296, the last VP33 residue observed by mass spectrometry, is in a structurally similar location as a putative trypsin maturation cleavage site in classical HAstVs (R313 in HAstV-8) that is thought to be important for exposing a membrane-lytic peptide (Fig 4C and 4D) [59]. Next, we observed that VP38 amino acids include the C-terminal end of the predicted HAstV-VA1 capsid core structural domain, a predicted

linker region, and the full spike domain (Fig 4C). VP38 starts with ~42 residues that are predicted to form integral structural components of the outer region of the core domain, ensuring that the VP38 remains tethered to the icosahedral surface of the capsid. Finally, it is worth noting that the last VP38 residue observed by mass spectrometry, P680, is also the last structured amino acid in the HAsV-VA1 spike domain. Due to the size of VP38, it is predicted that the C-terminal acidic region of the HAsV-VA1 capsid is proteolytically removed intracellularly, similar to classical HAsVs that are cleaved intracellularly by caspases [47]. While there are a number of putative caspase cleavage sites (aspartates) in the HAsV-VA1 capsid C-terminus (residues 700–720), it was previously shown that the pan-caspase inhibitor Z-VAD-FMK did not affect the proteolytic processing of HAsV-VA1 capsid or production of infectious HAsV-VA1 virus [47].

### Sequence and structural comparison of HAsV-VA1<sup>gastro</sup> and HAsV-VA1<sup>neuro</sup> spikes

To date, only 9 cases of HAsV-VA1 associated encephalitis are reported, of which six of those HAsV-VA1 capsid sequences are reported [22,23,27–31,33]. To understand if sequence and/or structural changes might be driving some strains of HAsV-VA1 to be able to infect the CNS, we first evaluated the capsid spike sequence differences in five representative sequences of HAsV-VA1 associated with gastroenteritis (HAsV-VA1<sup>gastro</sup>) and all six of the publicly available sequences of HAsV-VA1 associated with neurological disease (HAsV-VA1<sup>neuro</sup>) (Fig 5A) [60,61]. We observed that the HAsV-VA1<sup>gastro</sup> spike sequence is generally more conserved than the HAsV-VA1<sup>neuro</sup> spike sequence. Specifically, only six variable sites were observed in HAsV-VA1<sup>gastro</sup> spike sequences, whereas 27 variable sites were observed in HAsV-VA1<sup>neuro</sup> spike sequences. Notably, none of these 27 residues in the HAsV-VA1<sup>neuro</sup> spike sequences differed in a way that might indicate that one or more of these residues was a driver for infection of the CNS. Moreover, none of these sites of variability mapped onto a specific region of the spike, rather they were scattered all over the spike (Fig 5B). Finally, to evaluate if there are structural changes in the spike that drive infection of the CNS, we aligned the HAsV-VA1<sup>gastro</sup> and HAsV-VA1<sup>neuro</sup> spike structures (Fig 5C), which resulted in an RMSD of 0.78 Å and TM-score of 0.97, revealing that no major structural differences are observed.

### Evaluation of antibody binding to HAsV-VA1<sup>gastro</sup> and HAsV-VA1<sup>neuro</sup> spikes

One reason for the higher sequence variability in the HAsV-VA1<sup>neuro</sup> spikes could be that the virus evolved to evade patient antibodies. A number of the patients with HAsV-VA1-associated neurological disease were reported to have received immunoglobulin therapy, which likely contains antibodies against HAsV-VA1<sup>gastro</sup>, as there is a high seroprevalence of neutralizing antibodies to HAsV-VA1 in adults [35]. To evaluate the antigenicity of HAsV-VA1<sup>gastro</sup> and HAsV-VA1<sup>neuro</sup> spikes, we performed a number of antibody binding assays using anti-HAsV-VA1<sup>gastro</sup> rabbit polyclonal serum. First, approximately equal amounts of recombinant HAsV-VA1<sup>gastro</sup> and HAsV-VA1<sup>neuro</sup> spike protein were evaluated by SDS-PAGE and Western Blot, demonstrating that the denatured spike proteins have linear epitopes for anti-HAsV-VA1<sup>gastro</sup> antibodies (Fig 6A). Next, a dilution-series enzyme-linked immunosorbent assay (ELISA) was performed by coating wells with recombinant HAsV-VA1<sup>gastro</sup> or HAsV-VA1<sup>neuro</sup> spike protein and evaluating binding to anti-HAsV-VA1<sup>gastro</sup> antibodies (Fig 6B). A difference in binding between HAsV-VA1<sup>gastro</sup> and HAsV-VA1<sup>neuro</sup> spikes was observed, although, due to limitations in sample amounts, these samples were performed only in duplicate and could not be evaluated for significance. Instead, we pursued a more



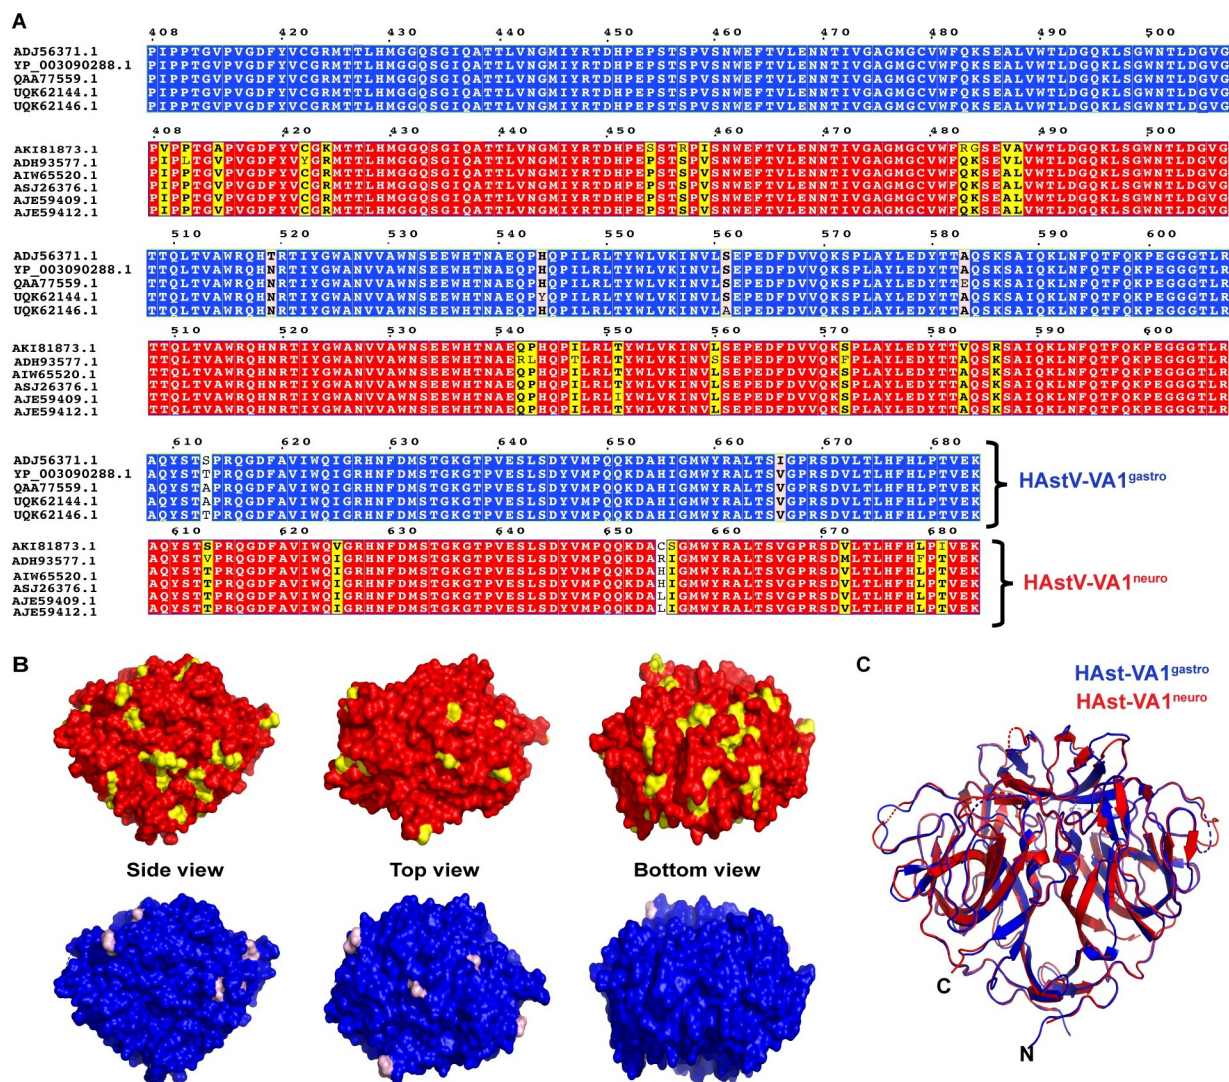

**Fig 5. Comparison of HAstV-VA1<sup>gastro</sup> and HAstV-VA1<sup>neuro</sup> spike sequences and structures.** (A) Five representative HAstV-VA1<sup>gastro</sup> spike sequences (blue) and all five available HAstV-VA1<sup>neuro</sup> spike sequences (red) aligned using the MUSCLE algorithm. Sequence differences between HAstV-VA1<sup>gastro</sup> spikes are colored light pink, and sequence differences between HAstV-VA1<sup>neuro</sup> spikes are colored yellow. (B) Location of variations (yellow and light pink) mapped onto the VA1 spike structure, presented as a surface model from side, top, and bottom views. (C) Structural alignment between the crystal structures of the HAstV-VA1<sup>gastro</sup> spike (blue)(accession no: YP\_003090288.1) and the HAstV-VA1<sup>neuro</sup> spike (red)(accession no: ADH93577.1), presented as cartoon view.

<https://doi.org/10.1371/journal.ppat.1012028.g005>

quantitative approach using a biolayer interferometry immunosorbent assay (BLI-ISA) that we have used previously to evaluate relative polyclonal antibody levels in human sera [62,63]. In the BLI-ISA, HAstV-VA1<sup>gastro</sup> and HAstV-VA1<sup>neuro</sup> spike proteins containing 10-histidine tags are loaded onto Anti-Penta-His biosensors (Fig 6C). A similar signal increase at this step confirms that equal amounts of the spike proteins are loaded onto the biosensors (Fig 6D). After a buffer step to ensure a steady baseline, the biosensors are then submerged into a 1:20 dilution of the rabbit polyclonal serum containing anti-HAstV-VA1<sup>gastro</sup> antibodies (Fig 6C). A control biosensor not coated with spike protein shows no signal at this step, demonstrating that there is no background binding of serum biomolecules to the biosensors (Fig 6C). We

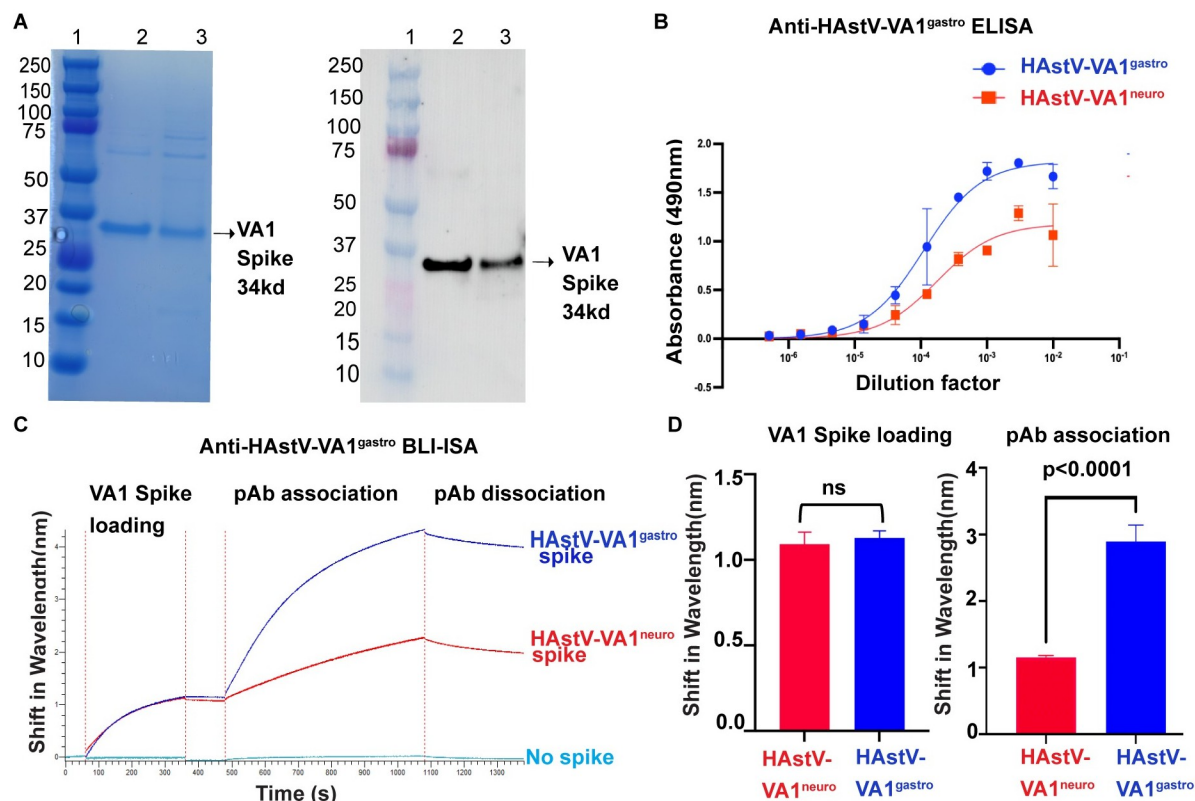

**Fig 6. Antigenic analyses of HAstV-VA1<sup>gastro</sup> and HAstV-VA1<sup>neuro</sup> spikes.** (A) Coomassie-stained SDS PAGE and anti-HAstV-VA1<sup>gastro</sup> Western Blot analyses of recombinant HAstV-VA1<sup>gastro</sup> and HAstV-VA1<sup>neuro</sup> spike proteins. Lane 1: molecular weight marker, in kD (Biorad Precision Plus Protein Dual Color Standards). Lane 2: HAstV-VA1<sup>gastro</sup> spike. Lane 3: HAstV-VA1<sup>neuro</sup> spike. (B) Anti-HAstV-VA1<sup>gastro</sup> ELISA. Wells were coated with either HAstV-VA1<sup>gastro</sup> spike (blue) or HAstV-VA1<sup>neuro</sup> spike (red), and the immunoassay was performed against a serial dilution of anti-HAstV-VA1<sup>gastro</sup> rabbit serum. Error bars indicate the standard deviation of duplicates. (C) Anti-HAstV-VA1<sup>gastro</sup> BLI-ISA. After an initial baseline step, histidine-tagged HAstV-VA1<sup>gastro</sup> spike protein (blue) or HAstV-VA1<sup>neuro</sup> spike protein (red) or no protein (cyan) were loaded onto Anti-Penta-His biosensors, followed by another baseline step. Biosensors were then dipped into a 1:20 dilution of anti-HAstV-VA1<sup>gastro</sup> rabbit serum containing polyclonal antibodies (pAb) for 10 minutes. Biosensors were then dipped into buffer to evaluate pAb dissociation. Signal changes during the HAstV-VA1 spike loading step and during the polyclonal antibody association step were measured. (D) BLI-ISA average signal changes during the HAstV-VA1 spike loading step and during the polyclonal antibody association step. Bars represent the mean of three independent experiments, and error bars indicate the standard deviation. A two-tailed T-test was performed to evaluate significance.

<https://doi.org/10.1371/journal.ppat.1012028.g006>

performed three independent BLI-ISA experiments and determined the average signal increase at the polyclonal antibody association step for each sample (Fig 6D). Statistical analyses confirm that there is a significant decrease in antibody binding to the HAstV-VA1<sup>neuro</sup> spike compared to the HAstV-VA1<sup>gastro</sup> spike (Fig 6D). Thus, these data reveal that mutations present in the HAstV-VA1<sup>neuro</sup> spike protein result in reduced anti-HAstV-VA1<sup>gastro</sup> polyclonal antibody binding.

## Discussion

In differential diagnosis of central nervous system infections, including encephalitis and meningitis, human astroviruses from the VA/HMO clade are increasingly associated with infections, particularly in immunocompromised patients, with high rates of mortality. Neurological diseases in domesticated mammals, such as in mink, ovine, bovine and porcine, are also associated with infection by VA/HMO astroviruses [13,14,17,20,64–66]. To understand how

HAsV-VAs differ structurally from classical HAsVs, we investigated the sequence-divergent HAsV-VA1 capsid spike.

We report the high-resolution structure of the HAsV-VA1 capsid spike. While the spike domain structure is similar to that of classical and MLB HAsV spikes in that it forms a homodimer and shares a common beta-barrel fold, the HAsV-VA1 capsid spike is larger and strikingly different in its overall shape and its biochemical surface. Notably, there are no shared conserved patches of amino acids on the surface of classical and VA1 spikes. Specifically, in classical HAsVs, the spike has an important role in virus attachment to host cells, and patches of conserved amino acids on the surface of the spike of classical HAsVs, termed P site, S site, and beta-turn, are predicted to be involved in cell attachment [52,56,57]. These conserved patches are not observed on the surface of the HAsV-VA1 spike, suggesting that HAsV-VA1/HMO viruses may utilize a different receptor for cell attachment, which in turn may influence their propensity to infect CNS cells. An infection competition assay supports these structural observations since the recombinant HAsV-1 capsid spike impedes infection by HAsV-1, but not by HAsV-VA1, suggesting that these two viruses utilize a different receptor. We further investigated whether there were sequence or structural differences between the HAsV-VA1 capsid spikes from gastrointestinal and neuronal HAsV-VA1 strains that might account for the ability of the neuronal HAsV-VA1 strains to infect the CNS. However, we did not observe any conserved sequence variations within the neuronal HAsV-VA1 capsid spikes that might account for their ability to infect the CNS. Furthermore, we solved the structure of a neuronal HAsV-VA1 capsid spike and observed no major structural differences. Altogether, these studies support that HAsV-VA1 may utilize a distinct receptor for cellular infection compared to classical HAsV, and that this difference, rather than the attainment of one or more mutations, may contribute to the ability of HAsV-VA1/HMO strains to more readily infect the CNS.

It is also possible that there are other differences in the HAsV-VA1 life cycle besides cell attachment that influence its ability to infect the CNS. One difference could be the capsid proteolytic processing that is required for HAsV infectivity. While classical HAsVs require extracellular trypsin for infectivity *in vitro*, HAsV-VA1 does not require extracellular trypsin for infectivity and instead becomes processed intracellularly by an unknown protease [46]. Thus, the requirement for extracellular proteases, such as those found in the intestinal tract, may limit the ability of classical HAsVs to spread beyond the intestinal tract, whereas the HAsV-VA1 does not appear to have this limitation. Despite this difference, we provide evidence showing that the proteolytic processing of the classical HAsV and HAsV-VA1 capsids appears to follow a similar path. Specifically, our mass spectrometry data support that the HAsV-VA1 capsid becomes cleaved in one or more places in the outer region of the capsid core domain, which forms the shell of the virus capsid. Recent studies suggest that this proteolytic processing in HAsVs may expose a membrane-lytic peptide utilized for host membrane disruption during cell entry [59]. Our data support that HAsV-VA1 utilizes a similar mechanism to promote infectivity. However, it is not clear how HAsV-VA1 prevents lysis of the cell upon intracellular proteolytic processing. One possibility is that proteolysis may prime the virus for entry, but another cue such as receptor engagement, endosomal acidification, proximity to membranes, and/or other factor may be required for peptide penetration of membranes. Overall, our data reveals a roadmap to understand the structural assembly of HAsV-VA1 capsid.

Beyond structural analyses, we evaluated the antigenicity of the HAsV-VA1 spike using ELISA and BLI-ISA. We had observed that neuronal HAsV-VA1 sequences had more amino acid variations than gastrointestinal HAsV-VA1 sequences, and we hypothesized that this could be due to virus evasion of human antibody responses. Our ELISA and BLI-ISA data support this hypothesis. While these results are not entirely surprising given that the antibodies



were raised against a gastrointestinal HAsV-VA1 strain, they do demonstrate that antibodies to a gastrointestinal HAsV-VA1 virus are less reactive to neuronal HAsV-VA1 spike compared to gastrointestinal HAsV-VA1 spike. Nevertheless, we cannot rule out the possibility that the observed variation in neuronal HAsV-VA1 sequences is due simply to virus intra-host variations that accumulated over the course of the infection. In fact, in most reports, the length of neurological symptoms was reported to be several weeks or months.

In a larger sense, our data provide a foundation for a number of future basic and applied studies. First, the delineation of the HAsV-VA1 capsid spike domain and methods to produce it recombinantly in bacteria open new avenues to evaluate its role in cell attachment, as was done with recombinant spikes for classical HAsV and HAsV-MLB [51,56]. Moreover, recombinant HAsV-VA1 spike can be utilized for co-precipitation studies to identify candidate host receptors. It can also be utilized as an antigen to discover monoclonal antibodies, which could be used for virus neutralization and epitope mapping studies as well as the development of antibody therapeutics for HAsV-VA1 infections. Furthermore, serological studies such as ELISAs utilizing recombinant HAsV-VA1 spike as the antigen could be used to investigate HAsV-VA1 seroprevalence in humans or evaluate different batches of intravenous immunoglobulin for therapeutic use. Finally, recombinant HAsV-VA1 spike can be evaluated as a candidate vaccine immunogen to elicit HAsV-VA neutralizing antibodies, as has been previously shown for classical HAsVs [57].

## Methods

### Phylogenetic analysis

The cladogram in Fig 1A was constructed using complete capsid protein sequences with the following NCBI accession numbers: Human astrovirus 1: AAC60723.1, Human astrovirus 2: QKW90827.1, Human astrovirus 3: QJX57344.1, Human astrovirus4: AGV40902.1, Human astrovirus 5: QKW90830.1, Human astrovirus 6: ACV92107.1, Human astrovirus 7: AAK31913.1, Human astrovirus 8: QGL54773.1, Human astrovirus MLB1: BAU68081.1, Human astrovirus MLB2: AMR45107.1, Human astrovirus MLB3: YP\_006905854.1, Human astrovirus VA1 Neuronal: ADH93577.1, Human astrovirus VA1 Gastrointestinal: YP\_003090288.1, Human astrovirus VA2: ACX83591.2, Human astrovirus VA3: YP\_006905860.1, Human astrovirus VA4: YP\_006905857.1, Human astrovirus VA5: AJI44022.1, Astrovirus VA6 UQK62274.1, Mink Astrovirus ADR65076.1, Ovine Astrovirus QDA34115.1, Bovine astrovirus CUI02224.1, Turkey astrovirus 1: AOR81715.1, Turkey astrovirus 2: NP\_987088.1, Turkey astrovirus 3: AAV37187.1.

### HAsV-VA1 capsid spike multiple sequence alignments

The multiple sequence alignment in Fig 5A was prepared using five representative gastrointestinal HAsV-VA1 capsid spike sequences with the following NCBI accession numbers: Human Astrovirus VA1 ADJ56371.1, Human Astrovirus YP\_003090288.1, Human Astrovirus VA1 QAA77559.1, Human Astrovirus VA1 UQK62144.1, and Human Astrovirus VA1 UQK62146.1, and all 6 available neuronal HAsV-VA1 capsid spike sequences with the following NCBI accession numbers: Human Astrovirus VA1 AKI81873.1, Human Astrovirus VA1 ADH93577.1, Human Astrovirus VA1 AIW65520.1, Human Astrovirus VA1 ASJ26376.1, Human Astrovirus VA1 AJE59409.1, and Human Astrovirus VA1 AJE59412.1 using ESPript 3.0 [61] which is an online server and renders sequence similarities using pre-aligned sequences. The pre-aligned spike sequences were generated in AliView software using MUSCLE algorithm [60].

### Expression, purification, limited proteolysis, and mass spectrometry of neuronal HAsV-VA1 capsid C-term

A codon-optimized synthetic gene encoding the neuronal HAsV-VA1 capsid residues 394–758 (NCBI accession number ADH93577.1) termed HAsV-VA1 capsid C-term was cloned into the plasmid pBacPAK8 in frame with an N-terminal 10-histidine tag. Recombinant baculovirus stocks were generated using the flashBAC system (Mirus Bio). Sf9 insect cells in ESF921 media (Expression Systems) at a density of 2 million viable cells/mL were infected with 0.025 mL of baculovirus stock/mL culture and cultured at 180 rpm at 27°C for 4 days. Cells were harvested by centrifugation, resuspended in buffer A (10 mM Tris-HCl pH 8.0, 300 mM NaCl, 20 mM imidazole, 2 mM MgCl<sub>2</sub>, EDTA-free protease inhibitor cocktail (Millipore), and 0.0125 U/ml benzonase (Millipore)), and lysed by sonication. The lysate was clarified by centrifugation (40,000 g), 0.22µm-filtered, and the HAsV-VA1 capsid C-term protein was purified from the supernatant using TALON metal affinity chromatography. Limited proteolysis with trypsin protease was used to identify a trypsin-stable fragment. Briefly, HAsV-VA1 capsid C-term protein (~43kD) was incubated with 0.4 w/w trypsin overnight at 4°C. A ~36kD fragment was observed by Coomassie-stained SDS-PAGE. The trypsin-digested protein sample (20 µl) was injected at flow rate of 200 µl/min onto an HPLC with a reverse-phase column, 100mm x 2.1mm id, Proto 300 C4 (Higgins Analytical, Inc.) with a 5µm particle size. The mobile phase consisted of solvent A (0.1% formic acid in HPLC grade water) with a gradient to solvent B (0.1% formic acid in acetonitrile). The samples were analyzed by using a linear ion trap mass spectrometer system (LTQ, Thermo Finnigan). Protein and peptides were detected by full scan MS mode (over the m/z 300–2000) in positive mode. The electrospray voltage was set to 5 kV. Deconvoluted ESI mass spectra of the reversed-phase peaks were generated by Magtran software. The mass of the fragment, 36,020 Daltons, was very close to a theoretical tryptic fragment of 35,970 Daltons generated by cleavage after arginine 697.

### Expression and purification of neuronal HAsV-VA1 spike

A synthetic gene encoding the neuronal HAsV-VA1 capsid residues 394–697 was cloned into pBacPAK8 in frame with an N-terminal 10-histidine tag, superfolder GFP, and a thrombin protease cleavage site (termed sf-GFP HAsV-VA1 spike). Recombinant sf-GFP HAsV-VA1 spike was expressed in Sf9 insect cells and purified the same as was done for HAsV-VA1 capsid C-term. Recombinant sfGFP-VA1 spike was digested overnight with thrombin to remove the sf-GFP and dialyzed into 10 mM Tris-HCl pH 8.0 and 150 mM NaCl. The neuronal HAsV-VA1 capsid spike (HAsV-VA1<sup>neuro</sup> spike) was further purified by size exclusion chromatography on a Superdex 200 16/600 column (Cytiva). Fractions containing the HAsV-VA1<sup>neuro</sup> spike were concentrated to 2.3 mg/ml.

### Expression and purification of gastrointestinal HAsV-VA1 spike

A synthetic gene encoding the gastrointestinal HAsV-VA1 capsid spike (HAsV-VA1<sup>gastro</sup> spike) residues 408–684 (NCBI accession number YP\_003090288.1) was cloned into pET52b in frame with a C-terminal thrombin protease cleavage site and 10-histidine tag. The plasmid was transformed and grown in *E. coli* strain T7 Express (New England Biolabs) to an optical density reached 0.6, and protein production was induced with 1 mM isopropyl-D-thiogalactopyranoside (IPTG) at 18°C for 18 h. Cells were harvested by centrifugation and lysed by sonication in Buffer A (20 mM Tris-HCl pH 8.0, 500 mM NaCl, 20 mM imidazole) containing 2 mM MgCl<sub>2</sub>, 0.0125 U/ml benzonase (Millipore), and EDTA-free protease inhibitor cocktail (Roche). The cell lysate was clarified by centrifugation (40,000 g), 0.22µm-filtered, and the

HAsV-VA1<sup>gastro</sup> spike was purified from the supernatant using TALON metal affinity chromatography. The protein was digested overnight with thrombin to remove the 10X-histidine tag and dialyzed into 20 mM Tris-HCl pH 8.0 and 150 mM NaCl. The HAsV-VA1<sup>gastro</sup> spike protein was purified by size exclusion chromatography on a Superdex 200 increase 10/300 column (Cytiva) and concentrated to 6.0 mg/mL. The oligomeric state of the recombinant HAsV-VA1<sup>gastro</sup> spike was estimated by comparing its retention volume to those of Gel Filtration Standards (Bio-Rad) on the Superdex 200 increase 10/300 column.

### Structure determination of gastrointestinal and neuronal HAsV-VA1 spike proteins

The HAsV-VA1<sup>neuro</sup> spike protein was crystallized in 0.1 M HEPES pH 7.5 and 22.5% PEG3350 using the hanging drop method, and cryoprotected using 0.1 M HEPES pH 7.5, 27.5% PEG3350, and 25% glycerol. The HAsV-VA1<sup>gastro</sup> spike was crystallized in 0.2 M MgCl<sub>2</sub>, 0.1 M Tris-HCl pH 8.5, and 25% PEG3350 using the hanging drop method, and cryoprotected using 0.2 M MgCl<sub>2</sub>, 0.1 M Tris-HCl pH 8.5, 25% PEG3350, and 25% Ethylene glycol. All crystals were flash-frozen in liquid nitrogen and diffraction data from a single crystal were collected at cryogenic temperature using a wavelength of 0.97 Å at the Advanced Light Source beamline 5.0.1 for the HAsV-VA1<sup>neuro</sup> spike and a wavelength of 1.03 Å at the Advanced Photon Source beamline 23ID-D for the HAsV-VA1<sup>gastro</sup> spike. The data were processed with XDS for the HAsV-VA1<sup>neuro</sup> spike or Mosflm for the HAsV-VA1<sup>gastro</sup> spike and scaled with Aimless [67–69]. CC<sub>1/2</sub> and I/σI statistics were used to select the 2.73 Å resolution cutoff for the HAsV-VA1<sup>neuro</sup> spike data. The structure of the HAsV-VA1<sup>neuro</sup> spike protein was solved by molecular replacement in Phenix using part of a model generated by AlphaFold2 for the 2022 CASP15 competition. While the full AlphaFold2 model of the HAsV-VA1<sup>neuro</sup> spike did not yield a molecular replacement solution, deletion of amino acids with pLDDT confidence scores less than 55 (58 out of 272 amino acids) yielded a model that gave a partial molecular replacement solution (LLG = 137). The final HAsV-VA1<sup>neuro</sup> spike structure was refined and manually built using Phenix and Coot [69–71]. The structure of the HAsV-VA1<sup>gastro</sup> spike was solved by molecular replacement in Phenix using the crystal structure of the HAsV-VA1<sup>neuro</sup> spike protein as a starting model. The final HAsV-VA1<sup>gastro</sup> spike structure was refined and manually built using Phenix and Coot [69–71].

### HAsV infection competition assay with recombinant HAsV spike proteins

A HAsV infection competition assay was utilized to evaluate infection inhibition by recombinant spike proteins [51]. Briefly, Caco-2 cells were grown in 96-well tissue culture treated plates until confluence. The growth medium was removed and replaced by MEM pre-cooled to 4°C, and the cells were incubated for 20 min on ice. MEM was then replaced by virus diluted in MEM at an MOI of 0.02 and incubated on ice for 1 h. Unbound virus was washed away with MEM and the indicated concentration of the purified HAsV spike proteins, diluted in MEM, was added and incubated for 1 h on ice. The plates were then transferred to 37°C for 1 h, washed with MEM to remove the proteins, and then were incubated in DMEM supplemented with non-essential amino acids for 18 h for HAsV-1-RIVMb [72] or for 24h for HAsV-VA1. After this time, the cells were processed by an immunoperoxidase assay to detect the infected cells, as previously described [72] with some modifications. Briefly, the cells were fixed at room temperature for 20 min with 2% formaldehyde diluted in PBS and permeabilized with 0.2% Triton X-100-PBS for 15 min. To stain the cells infected with HAsV-1, a rabbit polyclonal serum to HAsV-1 was used and for cells infected with HAsV-VA1 we employed a

rabbit polyclonal serum raised against HAstV-VA1 [72]. Three independent experiments were performed in duplicate.

## ELISA

ELISA plates (Corning 3590) were coated over two days at 4°C with 50 µL per well of 2 µg/mL HAstV-VA1<sup>gastro</sup> spike in PBS, 2 µg/mL HAstV-VA1<sup>neuro</sup> spike in PBS, or 2 µg/mL control antigen BSA in PBS. After the two-day incubation, the antigen solutions were removed by aspiration and wells were washed three times with PBS-T (PBS with 0.1% Tween 20). The plates were blocked for one hour at room temperature with 200 µL per well of blocking buffer (5% non-fat milk in PBS-T). After removing the blocking buffer, primary polyclonal antibody in hyperimmune rabbit serum to HAstV-VA1<sup>gastro</sup> virus, first diluted 1:100 in blocking buffer and then diluted 1:3 in series in blocking buffer, was added to wells (140 µL/well) and incubated for two hours at room temperature. After incubation, the primary antibody was removed by aspiration and wells were washed three times with PBS-T. Next, a 1:3000 dilution of secondary antibody (anti-rabbit-IgG conjugated to horseradish peroxidase) (Thermo Fisher Scientific 31462) was prepared in 1% non-fat milk in PBS-T, and 50 µL of this secondary antibody was added to each well and incubated at room temperature for 1 hour. The plate was again washed three times with PBS-T and 100 µL of an OPD (o-phenylenediamine dihydrochloride) solution was added to each well. This substrate was left on the plate for 8 minutes and then the reaction was stopped by the addition of 50 µL per well of 3 M hydrochloric acid. The optical density at 490 nm (OD<sub>490</sub>) was measured using a Molecular Devices SPECTRAMax PLUS 384 plate reader. Background values (~0.05) from antigen-coated wells lacking primary antibody were subtracted from all data prior to curve fitting in Prism. Samples were performed in biological duplicates and error bars represent one standard deviation from the mean.

## Biolayer interferometry binding experiments

An Octet RED384 was used for collection of Biolayer interferometry data using the Data Acquisition Software (version 11.1.1.19). All Binding experiments were performed in assay buffer (PBS, 1% BSA, 0.05% Tween 20). Purified HAstV-VA1<sup>gastro</sup> and HAstV-VA1<sup>neuro</sup> spike proteins were diluted to a concentration of 2 µg/mL in assay buffer. Hyperimmune rabbit serum to HAstV-VA1<sup>gastro</sup> virus was diluted 1:20 in assay buffer. Binding assays were performed at room temperature with the plate shaking at 1000 rpm. Anti-Penta-His biosensors were pre-equilibrated for 10 min in assay buffer. To run the assay, biosensors were dipped in assay buffer for 1 min to obtain a baseline and then dipped in HAstV-VA1 spike proteins for 5 min to load the histidine-tagged antigens onto the biosensors. Next, biosensors were dipped in assay buffer for 2 min to obtain a baseline and then dipped into the 1:20 diluted rabbit sera for 10 min to measure association of serum antibodies. Dissociation was evaluated by dipping the biosensors into assay buffer for 5 min. To quantify serum antibody binding, the total signal increase during the association step was determined. Samples were performed in biological quadruplicates and error bars represent one standard deviation from the mean.

## LC-MS/MS of HAstV-VA1<sup>gastro</sup> capsid proteins

HAstV-VA1<sup>gastro</sup> virus was grown in Caco-2 cells as described previously [47]. Viral particles purified by CsCl isopycnic centrifugation were analyzed by 11% SDS-PAGE. The gel was stained with Coomassie brilliant blue R-250 (Sigma) and imaged with a laser scanner (Typhoon FLA 9500, GE Healthcare) using near-infrared emission. The VP33 and VP38 protein bands were cut out, and the polyacrylamide slices were sent to the Proteomics Facility at the Montreal Clinical Research Institute (Canada). The samples were prepared, digested with

either trypsin or ProAlanase, and analyzed by nanoscale liquid chromatography coupled to tandem mass spectrometry (nano-LC-MS/MS).

## Supporting information

**S1 Fig. Electron density maps of the HAsV-VA1<sup>gastro</sup> spike and the HAsV-VA1<sup>neuro</sup> spike.** Electron density maps (slate blue) are contoured at  $1.0\sigma$  around the indicated amino acids. Regions were selected to highlight the electron density around amino acids that differ between the strains, for example at (A) amino acids 421–423, (B) amino acids 487–489, and (C) amino acids 572–574.  
(PDF)

## Acknowledgments

We thank Dr. John Dzimianski and Dr. Sarvind Tripathi for assistance on X-ray diffraction data collection and structure determination. We thank Qiangli Zhang for assistance with mass spectrometry experiments at the UCSC Mass Spectrometry Facility to analyze the recombinant HAsV-VA1 capsid limited proteolysis samples. We thank Rafaela Espinosa for preparing the anti-HAsV-VA1 rabbit polyclonal serum. Beamline 5.0.1 of the Advanced Light Source, a DOE Office of Science User Facility under Contract No. DE-AC02-05CH11231, is supported in part by the ALS-ENABLE program funded by the National Institutes of Health, National Institute of General Medical Sciences, grant P30 GM124169-01. This research used resources of the Advanced Photon Source, a U.S. Department of Energy (DOE) Office of Science User Facility operated for the DOE Office of Science by Argonne National Laboratory under Contract No. DE-AC02-06CH11357. Funding for the purchase of the Octet RED384 instrument was supported by the NIH S10 shared instrumentation grant 1S10OD027012-01. Funding support for the UCSC Mass Spectrometry Facility was provided by the Thermo Electron Corporation (seed funds), the W.M. Keck Foundation (grant 001768), and NIH's National Center for Research Resources (grant S10RR020939).

## Author Contributions

**Conceptualization:** Carlos F. Arias, Rebecca M. DuBois.

**Funding acquisition:** Carlos F. Arias, Rebecca M. DuBois.

**Investigation:** Anisa Ghosh, Kevin Delgado-Cunningham, Tomás López, Cassidy Green.

**Supervision:** Carlos F. Arias, Rebecca M. DuBois.

**Visualization:** Anisa Ghosh.

**Writing – original draft:** Anisa Ghosh, Rebecca M. DuBois.

**Writing – review & editing:** Anisa Ghosh, Kevin Delgado-Cunningham, Tomás López, Cassidy Green, Carlos F. Arias, Rebecca M. DuBois.

## References

1. Bosch A, Pintó RM, Guix S. Human Astroviruses. Clin Microbiol Rev. 2014 Oct; 27(4):1048–74. <https://doi.org/10.1128/CMR.00013-14> PMID: 25278582
2. Hargest V, Davis AE, Tan S, Cortez V, Schultz-Cherry S. Human Astroviruses: A Tale of Two Strains. Viruses. 2021 Feb 27; 13(3):376. <https://doi.org/10.3390/v13030376> PMID: 33673521
3. MITCHELL DK, MATSON DO, CUBITT WD, JACKSON LJ, WILLCOCKS MM, PICKERING LK, et al. Prevalence of antibodies to astrovirus types 1 and 3 in children and adolescents in Norfolk, Virginia.



- Pediatr Infect Dis J. 1999 Mar; 18(3):249–54. <https://doi.org/10.1097/00006454-199903000-00008> PMID: 10093946
4. Kriston S, Willcocks MM, Carter MJ, Cubitt WD. Seroprevalence of astrovirus types 1 and 6 in London, determined using recombinant virus antigen. Epidemiol Infect. 1996 Aug 15; 117(1):159–64. <https://doi.org/10.1017/s095026880001266> PMID: 8760964
5. Koopmans MPG, Bijen MHL, Monroe SS, Vinjé J. Age-Stratified Seroprevalence of Neutralizing Antibodies to Astrovirus Types 1 to 7 in Humans in The Netherlands. Clinical Diagnostic Laboratory Immunology. 1998 Jan; 5(1):33–7. <https://doi.org/10.1128/CDLI.5.1.33-37.1998> PMID: 9455876
6. Finkbeiner SR, Li Y, Ruone S, Conrardy C, Gregoricus N, Toney D, et al. Identification of a Novel Astrovirus (Astrovirus VA1) Associated with an Outbreak of Acute Gastroenteritis. J Virol. 2009 Oct 15; 83(20):10836–9. <https://doi.org/10.1128/JVI.00998-09> PMID: 19706703
7. Finkbeiner SR. Detection of Newly Described Astrovirus MLB1 in Stool Samples from Children. Emerg Infect Dis. 2009 Mar; 15(3):441–4. <https://doi.org/10.3201/eid1503.081213> PMID: 19239759
8. Schibler, Brito, Zanella, Zdobnov, Laubscher, L'Huillier, et al. Viral Sequences Detection by High-Throughput Sequencing in Cerebrospinal Fluid of Individuals with and without Central Nervous System Disease. Genes (Basel). 2019 Aug 19; 10(8):625. <https://doi.org/10.3390/genes10080625> PMID: 31431002
9. Vu DL, Cordey S, Brito F, Kaiser L. Novel human astroviruses: Novel human diseases? Journal of Clinical Virology. 2016 Sep; 82:56–63. <https://doi.org/10.1016/j.jcv.2016.07.004> PMID: 27434149
10. Vu DL, Bosch A, Pintó R, Guix S. Epidemiology of Classic and Novel Human Astrovirus: Gastroenteritis and Beyond. Viruses. 2017 Feb 18; 9(2):33. <https://doi.org/10.3390/v9020033> PMID: 28218712
11. Vu DL, Sabrià A, Aregall N, Michl K, Sabrià J, Rodríguez Garrido V, et al. A Spanish case-control study in <5 year-old children reveals the lack of association between MLB and VA astrovirus and diarrhea. Sci Rep. 2020 Feb 4; 10(1):1760. <https://doi.org/10.1038/s41598-020-58691-3> PMID: 32020041
12. Holtz LR, Bauer IK, Rajendran P, Kang G, Wang D. Astrovirus MLB1 Is Not Associated with Diarrhea in a Cohort of Indian Children. PLoS One. 2011 Dec 9; 6(12):e28647. <https://doi.org/10.1371/journal.pone.0028647> PMID: 22174853
13. Blomström AL, Widén F, Hammer AS, Belák S, Berg M. Detection of a Novel Astrovirus in Brain Tissue of Mink Suffering from Shaking Mink Syndrome by Use of Viral Metagenomics. J Clin Microbiol. 2010 Dec; 48(12):4392–6. <https://doi.org/10.1128/JCM.01040-10> PMID: 20926705
14. Jakubczak A, Kowalczyk M, Mazurkiewicz I, Kondracki M. Detection of mink astrovirus in Poland and further phylogenetic comparison with other European and Canadian astroviruses. Virus Genes. 2021 Jun 15; 57(3):258–65. <https://doi.org/10.1007/s11262-021-01834-z> PMID: 33860418
15. Küchler L, Rüfli I, Koch MC, Hierweger MM, Kauer R V., Boujon CL, et al. Astrovirus-Associated Polioencephalomyelitis in an Alpaca. Viruses. 2020 Dec 30; 13(1):50. <https://doi.org/10.3390/v13010050> PMID: 33396858
16. Boujon CL, Koch MC, Kauer RV, Keller-Gautschi E, Hierweger MM, Hoby S, et al. Novel encephalomyelitis-associated astrovirus in a muskox (Ovibos moschatus): a surprise from the archives. Acta Vet Scand. 2019 Dec 24; 61(1):31. <https://doi.org/10.1186/s13028-019-0466-0> PMID: 31234899
17. Schlottau K, Schulze C, Bilk S, Hanke D, Höper D, Beer M, et al. Detection of a Novel Bovine Astrovirus in a Cow with Encephalitis. Transbound Emerg Dis. 2016 Jun; 63(3):253–9. <https://doi.org/10.1111/tbed.12493> PMID: 26948516
18. Küchler L, Koch MC, Seuberlich T, Boujon CL. Archive Mining Brings to Light a 25-Year Old Astrovirus Encephalitis Case in a Sheep. Front Vet Sci. 2019 Mar 4; 6. PMID: 30886851
19. Boros Á, Albert M, Pankovics P, Bíró H, Pesavento PA, Phan TG, et al. Outbreaks of Neuroinvasive Astrovirus Associated with Encephalomyelitis, Weakness, and Paralysis among Weaned Pigs, Hungary. Emerg Infect Dis. 2017 Dec; 23(12):1982–93. <https://doi.org/10.3201/eid2312.170804> PMID: 29148391
20. Pfaff F, Schlottau K, Scholes S, Courtenay A, Hoffmann B, Höper D, et al. A novel astrovirus associated with encephalitis and ganglionitis in domestic sheep. Transbound Emerg Dis. 2017 Jun; 64(3):677–82. <https://doi.org/10.1111/tbed.12623> PMID: 28224712
21. Baxendale W, Mebatsion T. The isolation and characterisation of astroviruses from chickens. Avian Pathology. 2004 Jun 1; 33(3):364–70. <https://doi.org/10.1080/0307945042000220426> PMID: 15223568
22. Frémond ML, Pérot P, Muth E, Cros G, Dumarest M, Mahlaoui N, et al. Next-Generation Sequencing for Diagnosis and Tailored Therapy: A Case Report of Astrovirus-Associated Progressive Encephalitis. J Pediatric Infect Dis Soc. 2015 Sep; 4(3):e53–7. <https://doi.org/10.1093/jpids/piv040> PMID: 26407445
23. Naccache SN, Peggs KS, Mattes FM, Phadke R, Garson JA, Grant P, et al. Diagnosis of Neuroinvasive Astrovirus Infection in an Immunocompromised Adult With Encephalitis by Unbiased Next-Generation

- Sequencing. *Clinical Infectious Diseases*. 2015 Mar 15; 60(6):919–23. <https://doi.org/10.1093/cid/ciu912> PMID: 25572898
24. Koukou G, Niendorf S, Hornei B, Schlump JU, Jenke AC, Jacobsen S. Human astrovirus infection associated with encephalitis in an immunocompetent child: a case report. *J Med Case Rep*. 2019 Dec 23; 13(1):341. <https://doi.org/10.1186/s13256-019-2302-6> PMID: 31757225
  25. Cordey S, Vu DL, Schibler M, L'Huillier AG, Brito F, Docquier M, et al. Astrovirus MLB2, a New Gastroenteric Virus Associated with Meningitis and Disseminated Infection. *Emerg Infect Dis*. 2016 May; 22(5):846–53. <https://doi.org/10.3201/eid2205.151807> PMID: 27088842
  26. Sato M, Kuroda M, Kasai M, Matsui H, Fukuyama T, Katano H, et al. Acute encephalopathy in an immunocompromised boy with astrovirus-MLB1 infection detected by next generation sequencing. *Journal of Clinical Virology*. 2016 May; 78:66–70. <https://doi.org/10.1016/j.jcv.2016.03.010> PMID: 26991054
  27. Wunderli W, Meerbach A, Guengoer T, Berger C, Greiner O, Caduff R, et al. Astrovirus Infection in Hospitalized Infants with Severe Combined Immunodeficiency after Allogeneic Hematopoietic Stem Cell Transplantation. *PLoS One*. 2011 Nov 11; 6(11):e27483. <https://doi.org/10.1371/journal.pone.0027483> PMID: 22096580
  28. Quan PL, Wagner TA, Briese T, Torgerson TR, Hornig M, Tashmukhamedova A, et al. Astrovirus Encephalitis in Boy with X-linked Agammaglobulinemia. *Emerg Infect Dis*. 2010 Jun; 16(6):918–25. <https://doi.org/10.3201/eid1606.091536> PMID: 20507741
  29. Lum SH, Turner A, Guiver M, Bonney D, Martland T, Davies E, et al. An emerging opportunistic infection: fatal astrovirus (VA1/HMO-C) encephalitis in a pediatric stem cell transplant recipient. *Transplant Infectious Disease*. 2016 Dec; 18(6):960–4. <https://doi.org/10.1111/tid.12607> PMID: 27632248
  30. Brown JR, Morfopoulou S, Hubb J, Emmett WA, Ip W, Shah D, et al. Astrovirus VA1/HMO-C: An Increasingly Recognized Neurotropic Pathogen in Immunocompromised Patients. *Clinical Infectious Diseases*. 2015 Mar 15; 60(6):881–8. <https://doi.org/10.1093/cid/ciu940> PMID: 25572899
  31. Bami S, Hidinger J, Madni A, Hargest V, Schultz-Cherry S, Cortez V, et al. Human Astrovirus VA1 Encephalitis in Pediatric Patients With Cancer: Report of 2 Cases and Review of the Literature. *J Pediatric Infect Dis Soc*. 2022 Sep 29; 11(9):408–12. <https://doi.org/10.1093/jpids/piac045> PMID: 35849135
  32. Maximova OA, Weller ML, Krogmann T, Sturdevant DE, Ricklefs S, Virtaneva K, et al. Pathogenesis and outcome of VA1 astrovirus infection in the human brain are defined by disruption of neural functions and imbalanced host immune responses. *PLoS Pathog*. 2023 Aug 18; 19(8):e1011544. <https://doi.org/10.1371/journal.ppat.1011544> PMID: 37595007
  33. Król L, Turkiewicz D, Nordborg K, Englund E, Stenberg L, Karlsson Lindsjö O, et al. Astrovirus VA1/HMO encephalitis after allogeneic hematopoietic cell transplantation: Significant role of immune competence in virus control. *Pediatr Blood Cancer*. 2021 Dec 19; 68(12). <https://doi.org/10.1002/pbc.29286> PMID: 34411414
  34. Wilson MR, Sample HA, Zorn KC, Arevalo S, Yu G, Neuhaus J, et al. Clinical Metagenomic Sequencing for Diagnosis of Meningitis and Encephalitis. *New England Journal of Medicine*. 2019 Jun 13; 380(24):2327–40. <https://doi.org/10.1056/NEJMoa1803396> PMID: 31189036
  35. Janowski AB, Owen MC, Dudley H, López T, Espinosa R, Elvin-Lewis M, et al. High Seropositivity Rate of Neutralizing Antibodies to Astrovirus VA1 in Human Populations. *mSphere*. 2021 Oct 27; 6(5). <https://doi.org/10.1128/mSphere.00484-21> PMID: 34468168
  36. Bosch A, Guix S, Krishna NK, Méndez E, Monroe SS, Pantin-Jackwood M, et al. Virus taxonomy. Classification and Nomenclature of Viruses: Ninth Report of the International Committee on the Taxonomy of Viruses. 2011;953–9.
  37. Willcocks M. Identification and sequence determination of the capsid protein gene of human astrovirus serotype 1. *FEMS Microbiol Lett*. 1993 Nov 15; 114(1):1–7. [https://doi.org/10.1016/0378-1097\(93\)90133-m](https://doi.org/10.1016/0378-1097(93)90133-m) PMID: 8293952
  38. Monroe SS, Jiang B, Stine SE, Koopmans M, Glass RI. Subgenomic RNA sequence of human astrovirus supports classification of Astroviridae as a new family of RNA viruses. *J Virol*. 1993 Jun; 67(6):3611–4. <https://doi.org/10.1128/JVI.67.6.3611-3614.1993> PMID: 8497068
  39. Arias C, DuBois R. The Astrovirus Capsid: A Review. *Viruses*. 2017 Jan 19; 9(1):15. <https://doi.org/10.3390/v9010015> PMID: 28106836
  40. Lulla V, Firth AE. A hidden gene in astroviruses encodes a viroporin. *Nat Commun*. 2020 Aug 13; 11(1):4070. <https://doi.org/10.1038/s41467-020-17906-x> PMID: 32792502
  41. Firth AE, Atkins JF. Candidates in Astroviruses, Seadornaviruses, Cytorhabdoviruses and Coronaviruses for +1 frame overlapping genes accessed by leaky scanning. *Virol J*. 2010 Dec 25; 7(1):17. <https://doi.org/10.1186/1743-422X-7-17> PMID: 20100346

42. Méndez E, Fernández-Luna T, López S, Méndez-Toss M, Arias CF. Proteolytic Processing of a Serotype 8 Human Astrovirus ORF2 Polyprotein. *J Virol*. 2002 Aug 15; 76(16):7996–8002. <https://doi.org/10.1128/jvi.76.16.7996-8002.2002> PMID: 12134004
43. Méndez E, Salas-Ocampo E, Arias CF. Caspases Mediate Processing of the Capsid Precursor and Cell Release of Human Astroviruses. *J Virol*. 2004 Aug 15; 78(16):8601–8. <https://doi.org/10.1128/JVI.78.16.8601-8608.2004> PMID: 15280469
44. Dalton RM, Pastrana EP, Sánchez-Fauquier A. Vaccinia Virus Recombinant Expressing an 87-Kilodalton Polyprotein That Is Sufficient To Form Astrovirus-Like Particles. *J Virol*. 2003 Aug 15; 77(16):9094–8. <https://doi.org/10.1128/jvi.77.16.9094-9098.2003> PMID: 12885927
45. Bass DM, Qiu S. Proteolytic Processing of the Astrovirus Capsid. *J Virol*. 2000 Feb 15; 74(4):1810–4. <https://doi.org/10.1128/jvi.74.4.1810-1814.2000> PMID: 10644354
46. Aguilar-Hernández N, López S, Arias CF. Minimal capsid composition of infectious human astrovirus. *Virology*. 2018 Aug; 521:58–61. <https://doi.org/10.1016/j.virol.2018.05.021> PMID: 29883775
47. Aguilera-Flores C, López T, Zamudio F, Sandoval-Jaime C, Pérez EI, López S, et al. The Capsid Precursor Protein of Astrovirus VA1 Is Proteolytically Processed Intracellularly. *J Virol*. 2022 Jul 27; 96(14). <https://doi.org/10.1128/jvi.00665-22> PMID: 35762760
48. Dryden KA, Tihova M, Nowotny N, Matsui SM, Mendez E, Yeager M. Immature and Mature Human Astrovirus: Structure, Conformational Changes, and Similarities to Hepatitis E Virus. *J Mol Biol*. 2012 Oct; 422(5):650–8. <https://doi.org/10.1016/j.jmb.2012.06.029> PMID: 22743104
49. York RL, Yousefi PA, Bogdanoff W, Haile S, Tripathi S, DuBois RM. Structural, Mechanistic, and Antigenic Characterization of the Human Astrovirus Capsid. *J Virol*. 2016 Mar; 90(5):2254–63. PMID: 26656707
50. Toh Y, Harper J, Dryden KA, Yeager M, Arias CF, Méndez E, et al. Crystal Structure of the Human Astrovirus Capsid Protein. *J Virol*. 2016 Oct 15; 90(20):9008–17. <https://doi.org/10.1128/JVI.00694-16> PMID: 27466429
51. Delgado-Cunningham K, López T, Khatib F, Arias CF, DuBois RM. Structure of the divergent human astrovirus MLB capsid spike. *Structure*. 2022 Dec; 30(12):1573–1581.e3. <https://doi.org/10.1016/j.str.2022.10.010> PMID: 36417907
52. Dong J, Dong L, Méndez E, Tao Y. Crystal structure of the human astrovirus capsid spike. *Proceedings of the National Academy of Sciences*. 2011 Aug 2; 108(31):12681–6. <https://doi.org/10.1073/pnas.1104834108> PMID: 21768348
53. DuBois RM, Freiden P, Marvin S, Reddivari M, Heath RJ, White SW, et al. Crystal Structure of the Avian Astrovirus Capsid Spike. *J Virol*. 2013 Jul 15; 87(14):7853–63. <https://doi.org/10.1128/JVI.03139-12> PMID: 23658448
54. Bogdanoff WA, Campos J, Perez EI, Yin L, Alexander DL, DuBois RM. Structure of a Human Astrovirus Capsid-Antibody Complex and Mechanistic Insights into Virus Neutralization. *J Virol*. 2017 Jan 15; 91(2). <https://doi.org/10.1128/JVI.01859-16> PMID: 27807234
55. Bogdanoff WA, Perez EI, López T, Arias CF, DuBois RM. Structural Basis for Escape of Human Astrovirus from Antibody Neutralization: Broad Implications for Rational Vaccine Design. *J Virol*. 2018 Jan; 92(1). <https://doi.org/10.1128/JVI.01546-17> PMID: 29070688
56. Ricemeyer L, Aguilar-Hernández N, López T, Espinosa R, Lanning S, Mukherjee S, et al. Structures of Two Human Astrovirus Capsid/Neutralizing Antibody Complexes Reveal Distinct Epitopes and Inhibition of Virus Attachment to Cells. *J Virol*. 2022 Jan 12; 96(1). <https://doi.org/10.1128/JVI.01415-21> PMID: 34613806
57. Espinosa R, López T, Bogdanoff WA, Espinoza MA, López S, DuBois RM, et al. Isolation of Neutralizing Monoclonal Antibodies to Human Astrovirus and Characterization of Virus Variants That Escape Neutralization. *J Virol*. 2019 Jan 15; 93(2). <https://doi.org/10.1128/JVI.01465-18> PMID: 30355681
58. Haga K, Takai-Todaka R, Kato A, Nakanishi A, Katayama K. Neonatal Fc receptor is a functional receptor for human astrovirus. *bioRxiv* [Internet]. 2022 Jan 1; 2022.11.13.516297. Available from: <http://biorxiv.org/content/early/2022/11/13/2022.11.13.516297.abstract>
59. Ykema M, Ye K, Xun M, Harper J, Betancourt-Solis MA, Arias CF, et al. Human astrovirus capsid protein releases a membrane lytic peptide upon trypsin maturation. *J Virol*. 2023 Aug 31; 97(8). <https://doi.org/10.1128/jvi.00802-23> PMID: 37504573
60. Larsson A. AliView: a fast and lightweight alignment viewer and editor for large datasets. *Bioinformatics*. 2014 Nov 15; 30(22):3276–8. <https://doi.org/10.1093/bioinformatics/btu531> PMID: 25095880
61. Robert X, Gouet P. Deciphering key features in protein structures with the new ENDscript server. *Nucleic Acids Res*. 2014 Jul 1; 42(W1):W320–4. <https://doi.org/10.1093/nar/gku316> PMID: 24753421
62. Dzimianski J V., Lorig-Roach N O'Rourke SM, Alexander DL, Kimmey JM, DuBois RM. Rapid and sensitive detection of SARS-CoV-2 antibodies by biolayer interferometry. *Sci Rep*. 2020 Dec 10; 10(1):21738. <https://doi.org/10.1038/s41598-020-78895-x> PMID: 33303951

63. Meyer L, Delgado-Cunningham K, Lorig-Roach N, Ford J, DuBois RM. Human Astrovirus 1–8 Sero-prevalence Evaluation in a United States Adult Population. *Viruses*. 2021 May 25; 13(6):979. <https://doi.org/10.3390/v13060979> PMID: 34070419
64. Dolores GW, Caroline B, Hans HD, Englund L, Anne SH, Hedlund KO, et al. Investigations into Shaking Mink Syndrome: An Encephalomyelitis of Unknown Cause in Farmed Mink (*Mustela Vison*) Kits in Scandinavia. *Journal of Veterinary Diagnostic Investigation*. 2004 Jul 25; 16(4):305–12. PMID: 15305741
65. Li L, Diab S, McGraw S, Barr B, Traslavina R, Higgins R, et al. Divergent Astrovirus Associated with Neurologic Disease in Cattle. *Emerg Infect Dis*. 2013 Sep; 19(9):1385–92. <https://doi.org/10.3201/eid1909.130682> PMID: 23965613
66. Arruda B, Arruda P, Hensch M, Chen Q, Zheng Y, Yang C, et al. Porcine Astrovirus Type 3 in Central Nervous System of Swine with Polioencephalomyelitis. *Emerg Infect Dis*. 2017 Dec; 23(12):2097–100. <https://doi.org/10.3201/eid2312.170703> PMID: 29148383
67. Battye TGG, Kontogiannis L, Johnson O, Powell HR, Leslie AGW. *iMOSFLM*: a new graphical interface for diffraction-image processing with *MOSFLM*. *Acta Crystallogr D Biol Crystallogr*. 2011 Apr 1; 67(4):271–81. PMID: 21460445
68. Evans PR, Murshudov GN. How good are my data and what is the resolution? *Acta Crystallogr D Biol Crystallogr*. 2013 Jul 1; 69(7):1204–14. <https://doi.org/10.1107/S0907444913000061> PMID: 23793146
69. Afonine P V., Grosse-Kunstleve RW, Echols N, Headd JJ, Moriarty NW, Mustyakimov M, et al. Towards automated crystallographic structure refinement with *phenix.refine*. *Acta Crystallogr D Biol Crystallogr*. 2012 Apr 1; 68(4):352–67. PMID: 22505256
70. Emsley P, Lohkamp B, Scott WG, Cowtan K. Features and development of *Coot*. *Acta Crystallogr D Biol Crystallogr*. 2010 Apr 1; 66(4):486–501. PMID: 20383002
71. Liebschner D, Afonine P V., Baker ML, Bunkóczi G, Chen VB, Croll TI, et al. Macromolecular structure determination using X-rays, neutrons and electrons: recent developments in *Phenix*. *Acta Crystallogr D Struct Biol*. 2019 Oct 1; 75(10):861–77. PMID: 31588918
72. Aguilar-Hernández N, Meyer L, López S, DuBois RM, Arias CF. Protein Disulfide Isomerase A4 Is Involved in Genome Uncoating during Human Astrovirus Cell Entry. *Viruses*. 2020 Dec 31; 13(1):53. PMID: 33396308
